# Supplementary material
Source: PubMed Central journal article supplement (PMC4965313)
Supplement: NIHMS798913-supplement-Table_S1.pdf [file NIHMS798913-supplement-Table_S1.pdf]

**Supplementary Table 1:** Primers for *PIK3CA*, *TERT* and *TP53* mutational analysis and *FUS-DDIT3* fusion variant determination.

| Gene   | Exon     | Forward sequence                   | Reverse sequence        |
|--------|----------|------------------------------------|-------------------------|
| PIK3CA | 9        | TGACAAAGAACAGCTCAAAGC              | TTAGCACTTACCTGTGACTCCA  |
| PIK3CA | 20       | TGATGACATTGCATACATTCG              | TGTGTGGAAGATCCAATCCA    |
| TERT   | promoter | GTAAAACGACGGCCAGCAGCGCTGCCTGAAACTC | GTCCTGCCCTTCACCTT       |
| TP53   | 4a       | CCATCTACAGTCCCCCTTG                | ATGATGACAGGGGCCAGGAG    |
| TP53   | 4b       | GCACCAGCAGCTCCTACAC                | ATGAGCCCCTCAGGGCAACTG   |
| TP53   | 5        | TTTCAACTCTGTCTCCTTCCTCTT           | AGCCCTGTCGTCTCTCCAG     |
| TP53   | 6        | AGGCCTCTGATTCCTCACTG               | ATGAGAGACCCCAGTTGCAAACC |
| TP53   | 7        | CTTGGGCCTGTGTTATCTCC               | ATGAGTGTGCAGGGTGGCAAG   |
| TP53   | 8        | TGCTTCTCTTTTCCTATCCTGAG            | ATGAGCTTCTTGTCTGCTTGC   |
| TP53   | 9        | ACCTTTCCTTGCCTCTTTCC               | ATGAAGAAAACGGCATTGAGTG  |
| TP53   | 10       | CTTCTCCCCCTCCTCTGTTG               | ATGAGAAGGGGCTGAGGTCACTC |
| FUS    | 5        | GCAGAACCAGTACAACAGCA               | NA                      |
| FUS    | 6        | GAACCCAGAGGTCGTGGAG                | NA                      |
| FUS    | 7        | GGTGGCTTCAATAAATTTGG               | NA                      |
| FUS    | 12       | ATGAATGCAACCAGTGTAAGGCC            | NA                      |
| FUS    | 13       | TAAACCAGATGGCCCAGGAG               | NA                      |
| DDIT3  | 2        | NA                                 | TGCTTTCAGGTGTGGTGATG    |
| DDIT3  | 3        | NA                                 | GGAGAAAGGCAATGACTCAG    |

NA = not applicable.
