# Supplementary material
Source: PubMed Central journal article supplement (PMC4965313)
Supplement: NIHMS798913-supplement-Table_S2.pdf [file NIHMS798913-supplement-Table_S2.pdf]

**Supplementary Table 2.** STR typing results of metastatic tumor, xenograft tumor, DL-221 cell line and 402-91 and 1765-92 cell lines.

| <b>Sample</b>    | <b>AMEL</b> | <b>CSF1PO</b> | <b>D13S317</b> | <b>D16S539</b> | <b>D5S818</b> | <b>D7S820</b> | <b>TH01</b> | <b>TPOX</b> | <b>vWA</b> |
|------------------|-------------|---------------|----------------|----------------|---------------|---------------|-------------|-------------|------------|
| DL-221 Tumor     | X,Y         | 10.13         | 8.11           | 12.13          | 12            | 10.12         | 8.9         | 8           | 14.17      |
| DL-221 Xenograft | X           | 10.13         | 8.11           | 12.13          | 12            | 10.12         | 8.9         | 8           | 14.17      |
| DL-221 Cell line | X           | 10.13         | 8.11           | 12.13          | 12            | 10.12         | 8.9         | 8           | 14.17      |
| 402-91           | X,Y         | 11.12         | 11.12          | 11.12          | 11.14         | 10.12         | 6,9.3       | 8.11        | 14.18      |
| 1765-92          | X           | 11.12         | 11.12          | 12             | 11.12         | 9.13          | 7,9.3       | 8           | 15.18      |
