# Supplementary material
Source: PubMed Central journal article supplement (PMC4965313)
Supplement: NIHMS798913-supplement-Table_S4.pdf [file NIHMS798913-supplement-Table_S4.pdf]

**Supplementary Table 4.** Meerkat calls of the whole exome sequencing data for DDIT3-FUS.

| Sample           | #CHR1 | POS1     | ORI1 | Genes1 | CHR2  | POS2     | ORI2 | Genes2 | type | SVtype       | nPairs | nSplitReads | geneE112        | ENST1            | ENST2              | fusionAllowed | FrameType | Break1                                       | Break2                                            |
|------------------|-------|----------|------|--------|-------|----------|------|--------|------|--------------|--------|-------------|-----------------|------------------|--------------------|---------------|-----------|----------------------------------------------|---------------------------------------------------|
| Metastatic Tumor | chr16 | 31198198 | +    | FUS    | chr12 | 57912424 | +    | DDIT3  | CTX  | del_inso     | 14     | 7           | FUS.DDIT3.I7.I1 | NM_001170634 FUS | NM_001195053 DDIT3 | Y             | CD-UTR5   | NM_001170634 FUS:15exons_Left_Intron7.8_CD_1 | NM_001195053 DDIT3:4exons_Right_Intron1.2_UTR5_-1 |
| Cell Line        | chr16 | 31198198 | +    | FUS    | chr12 | 57912424 | +    | DDIT3  | CTX  | transl_inter | 22     | 10          | FUS.DDIT3.I7.I1 | NM_001170634 FUS | NM_001195053 DDIT3 | Y             | CD-UTR5   | NM_001170634 FUS:15exons_Left_Intron7.8_CD_1 | NM_001195053 DDIT3:4exons_Right_Intron1.2_UTR5_-1 |
