# Supplementary material
Source: PubMed Central journal article supplement (PMC4965313)
Supplement: NIHMS798913-supplement-Table_S5.pdf [file NIHMS798913-supplement-Table_S5.pdf]

**Supplementary Table 5.** Breakdancer calls of the whole exome sequencing data for DDIT3-FUS.

| Chr1 | Pos1     | Orient.1 | Gene  | Chr2 | Pos2     | Orient.2 | Gene | Type | Score | num_Reads | num_Reads_lib |
|------|----------|----------|-------|------|----------|----------|------|------|-------|-----------|---------------|
| 12   | 57912348 | 11+1-    | DDIT3 | 16   | 31197873 | 11+0-    | FUS  | CTX  | -264  | 99        | 11            |
